# Supplementary material
Source: publisher figshare collection journal article supplement (https://acs.figshare.com/ndownloader/files/7418038)
Supplement: Supplementary file 1 [file 7418038]

# Comparative Study of Single and Dual Gain-Narrowed Emission in Thiophene/Furan/Phenylene Co-oligomer Single Crystals

Hui Shang,<sup>†</sup> Hidekazu Shimotani,<sup>\*,†</sup> Susumu Ikeda,<sup>‡</sup> Thangavel Kanagasekaran,<sup>‡</sup> Kazuaki Oniwa,<sup>‡</sup> Tienan Jin,<sup>‡</sup> Naoki Asao,<sup>‡</sup> Yoshinori Yamamoto,<sup>‡</sup> Hiroyuki Tamura,<sup>‡</sup> Kenta Abe,<sup>†</sup> Miyuki Kanno,<sup>†</sup> Masayuki Yoshizawa,<sup>†</sup> Katsumi Tanigaki<sup>\*,†</sup>

<sup>†</sup>Department of Physics, Tohoku University, 6-3, Aramaki Aza-Aoba, Aoba-ku, Sendai 980-8578, Japan

<sup>‡</sup>WPI-Advanced Institute for Materials Research (WPI-AIMR), Tohoku University, 2-2-1 Katahira, Aoba-ku, Sendai 980-8577, Japan

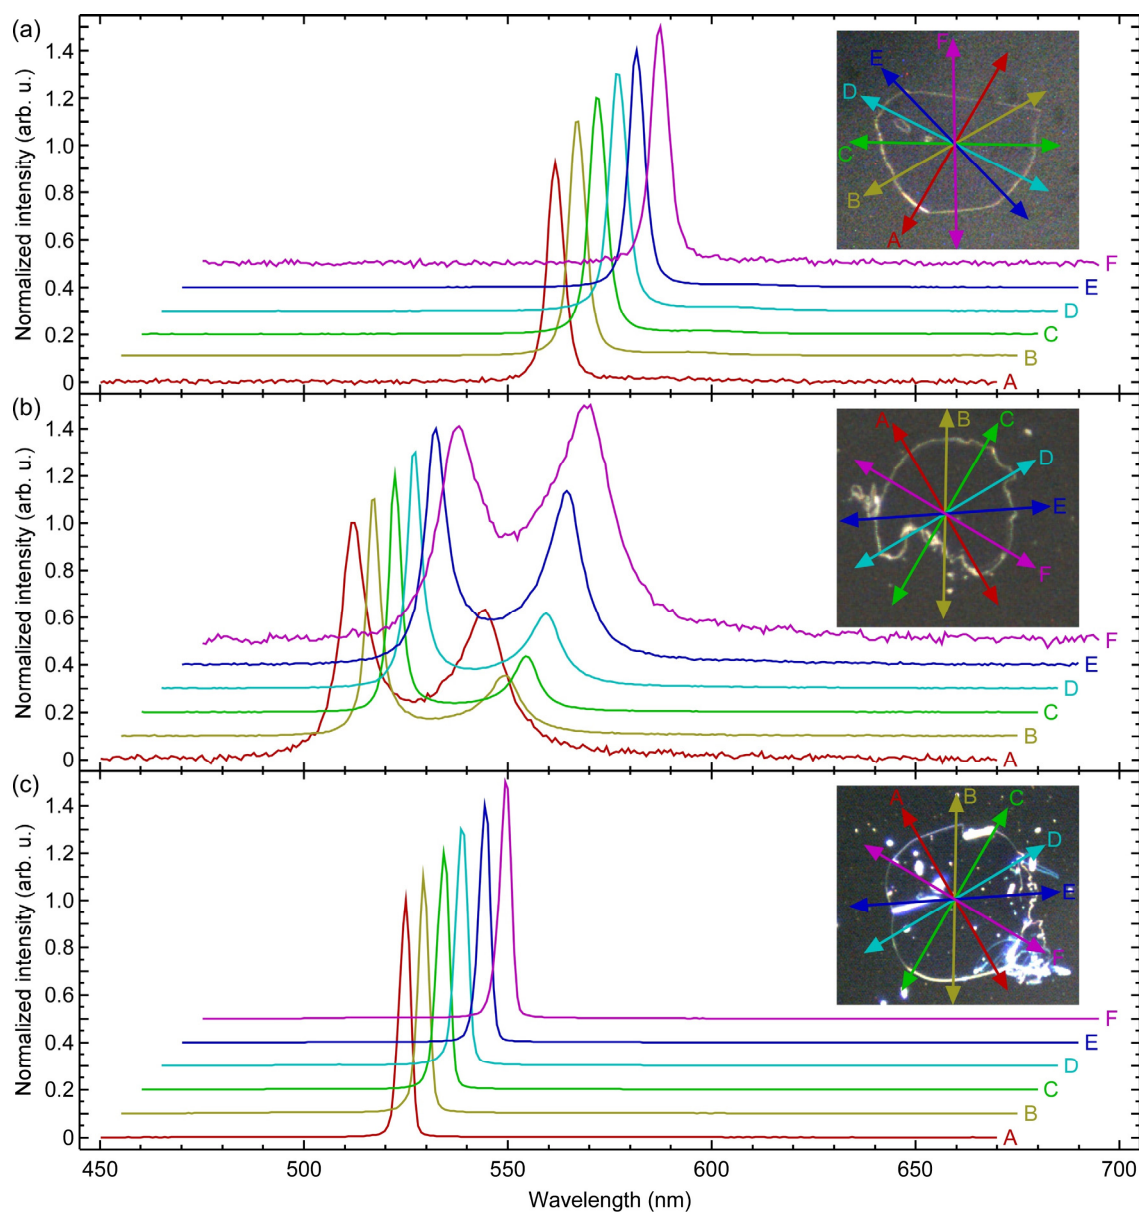

**Figure S1.** Polarization angle dependences of gain-narrowed photoluminescent spectra of (a) BP2T, (b) BPFT and (c) BP2F single crystal. The crystals were excited with a polarized 337.1 nm pulse laser. The incident angle was 30° to the *c*-axis of the crystal. Directions of polarization are indicated in the inset photograph.
